# Supplementary material for: (Epi)catechin damage effects on the development of mouse intestinal epithelial structure through the PERK-eIF2α-ATF4-CHOP pathway
Source: Royal Society of Chemistry journal article supplement (doi:10.1039/d3fo01841e), 2023-01-01
Supplement: d3fo01841e1.pdf [file d3fo01841e1.pdf]

## Supplement information for

(Epi)catechin damage effects on the development of mouse intestinal epithelial structure through the PERK-eIF2 $\alpha$ -ATF4-CHOP pathway.

Shijie Guo<sup>a#</sup>, Weiwei Huang<sup>a#</sup>, Qingqing Cao<sup>c</sup>, Qingbin Guo<sup>a</sup>, Jianzhong Han<sup>a,b\*</sup>, Yumei Qin<sup>a,b\*</sup>

<sup>a</sup> School of Food Science and Biotechnology, Zhejiang Gongshang University, Hangzhou 310018, China.

<sup>b</sup> Food Safety Key Laboratory of Zhejiang Province, School of Food Science and Biotechnology, Zhejiang Gongshang University, Hangzhou, China.

<sup>c</sup> Tea Research Institute, Chinese Academy of Agricultural Sciences, Key Laboratory of Tea Biology and Resources Utilization, Ministry of Agriculture, Hangzhou 310008, China.

# S. G and W. H equally contribute to this article

\* To whom correspondence should be addressed.

E-mail: yqin@zjgsu.edu.cn

hanjianzhong99@163.com

This file includes Figure S1 and Table S1, S2.

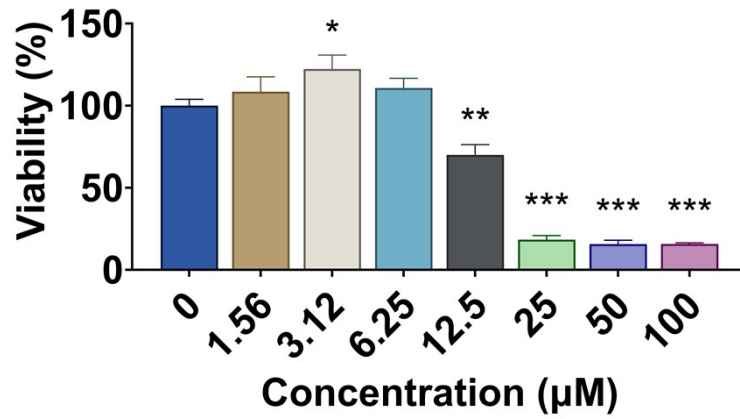

**Figure S1. Effects of different concentrations of GSK2606414 on organoid viability.** GSK2606414 pretreated the newly passed organoids for 1h and then incubated them for 48 hours after being stimulated by 0.3 mM EGCG for 1 h. Data was expressed as mean  $\pm$  SEM.

\* $p < 0.05$  、 \*\* $p < 0.01$  、 \*\*\* $p < 0.001$ .

**Table S1. Scoring standards for the disease activity index (DAI).**

| Score | Weight loss (%) | Fecal viscosity | Fecal occult blood |
|-------|-----------------|-----------------|--------------------|
| 0     | ≤1              | Normal          | Non-color          |
| 1     | >1-5            |                 | Pale blue          |
| 2     | >5-10           | Soft            | Blue               |
| 3     | >10-15          |                 | Blue grey.         |
| 4     | >15             | Liquid          | Blue black         |

**Table S2. Primer sequences used in qRT-PCR.**

| Gene name       | Primer sequence (5'-3')                                  |
|-----------------|----------------------------------------------------------|
| <i>Gapdh</i>    | F: GCATGGCCTTCCGTGTTCCCTA<br>R: GATGCCTGCTTCACCACCTTCT   |
| <i>Perk</i>     | F: CTCCTCTACCCATTCAGCACC<br>R: CTTGAACCATCATATGCTCTTGGG  |
| <i>Bip</i>      | F: CTGCGTGTGTGTGAGACCAG<br>R: AGCAGTCAGGCAGGAGTCTTA      |
| <i>Atf4</i>     | F: TAAGTTGTGTGCTCGGGTGT<br>R: GATTTTCGTGAAGAGCGCCA       |
| <i>Chop</i>     | F: CTGGAAGCCTGGTATGAGGAT<br>R: CAGGGTCAAGAGTAGTGAAGGT    |
| <i>Gadd34</i>   | F: CTCTAAAAGCTCGGAAGGTACAC<br>R: GGCTTCGATCTCGTGCAAAC    |
| <i>Ero1</i>     | F: GGAAGAAGAGACTGTGCCGT<br>R: CTTTCTGGGTCTCCTCACTCA      |
| <i>Dr5</i>      | F: ACTACACCAGCCATTCCAACC<br>R: CCGTCAGTGCAGTTAGAGCA      |
| <i>Bcl2</i>     | F: TGGCCTTCTTTGAGTTCGGT<br>R: ATAGTTCCACAAAGGCATCCCAG    |
| <i>Claudin3</i> | F: GTACAAGACGAGACGGCCAA<br>R: CGTACAACCCAGCTCCCATC       |
| <i>Occludin</i> | F: TTGAAAGTCCACCTCCTTACAGA<br>R: CCGGATAAAAAGAGTACGCTGG  |
| <i>Zo1</i>      | F: GGAGATGTTTATGCGGACGG<br>R: CCATTGCTGTGCTCTTAGCG       |
| <i>Lgr5</i>     | F: GAGTCAACCCAAGCCTTAGTATCC<br>R: CATGGGACAAATGCAACTGAAG |
